# Supplementary material for: Molecular Mechanism of the Piezoelectric Response in the β-Phase PVDF Crystals Interpreted by Periodic Boundary Conditions DFT Calculations
Source: MDPI journal article supplement (doi:10.3390/ma16176004), 2023-08-31
Supplement: s1 [file s1]

# **Molecular mechanism of the piezoelectric response in the $\beta$ -phase PVDF crystals interpreted by periodic boundary conditions DFT calculations**

Gianluca Serra, Alessia Arrigoni, Mirella Del Zoppo, Chiara Castiglioni\*, Matteo Tommasini\*

*Dipartimento di Chimica, Materiali e Ingegneria Chimica "Giulio Natta", Politecnico di Milano, Piazza Leonardo da Vinci 32, 20133 Milano, Italy*

\*Corresponding authors: [matteo.tommasini@polimi.it](mailto:matteo.tommasini@polimi.it); [chiara.castiglioni@polimi.it](mailto:chiara.castiglioni@polimi.it)

## **SUPPLEMENTARY MATERIALS**

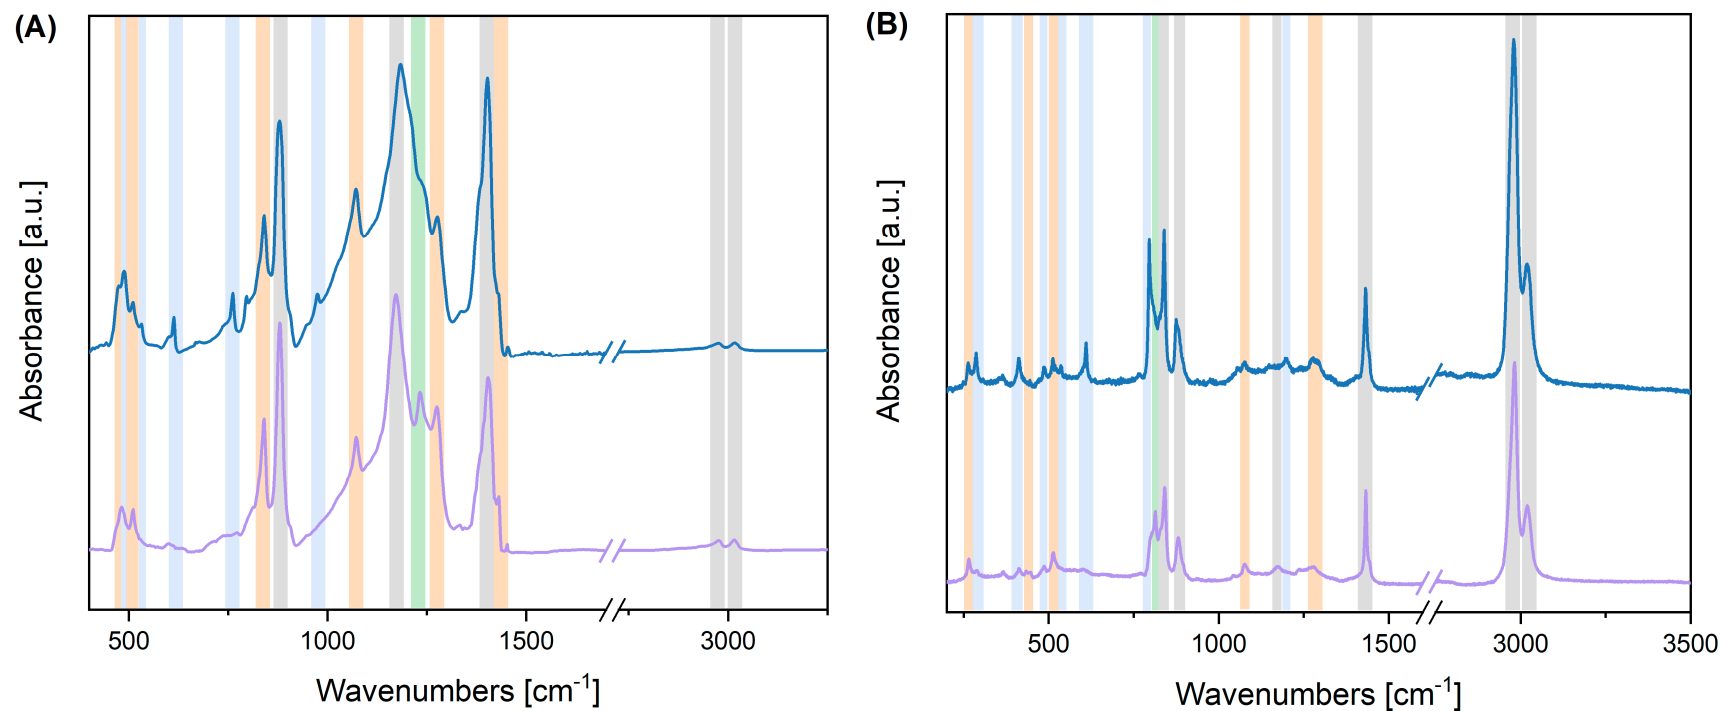

**Figure S1:** (A) Infrared spectra of a PVDF film sample (violet line) and PVDF electrospun fibers (blue line). (B) Raman spectra of a PVDF film sample (violet line) and PVDF electrospun fibers (blue line). Spectral markers of different PVDF polymorphs are highlighted: light blue is the  $\alpha$ -phase, orange is the  $\beta$ -phase, green is the  $\gamma$ -phase, and grey bands are related to both  $\alpha$ - and  $\beta$ -phase. Fibers are reported as a reference sample which shows clear marker bands due to the presence of the  $\alpha$  polymorph.

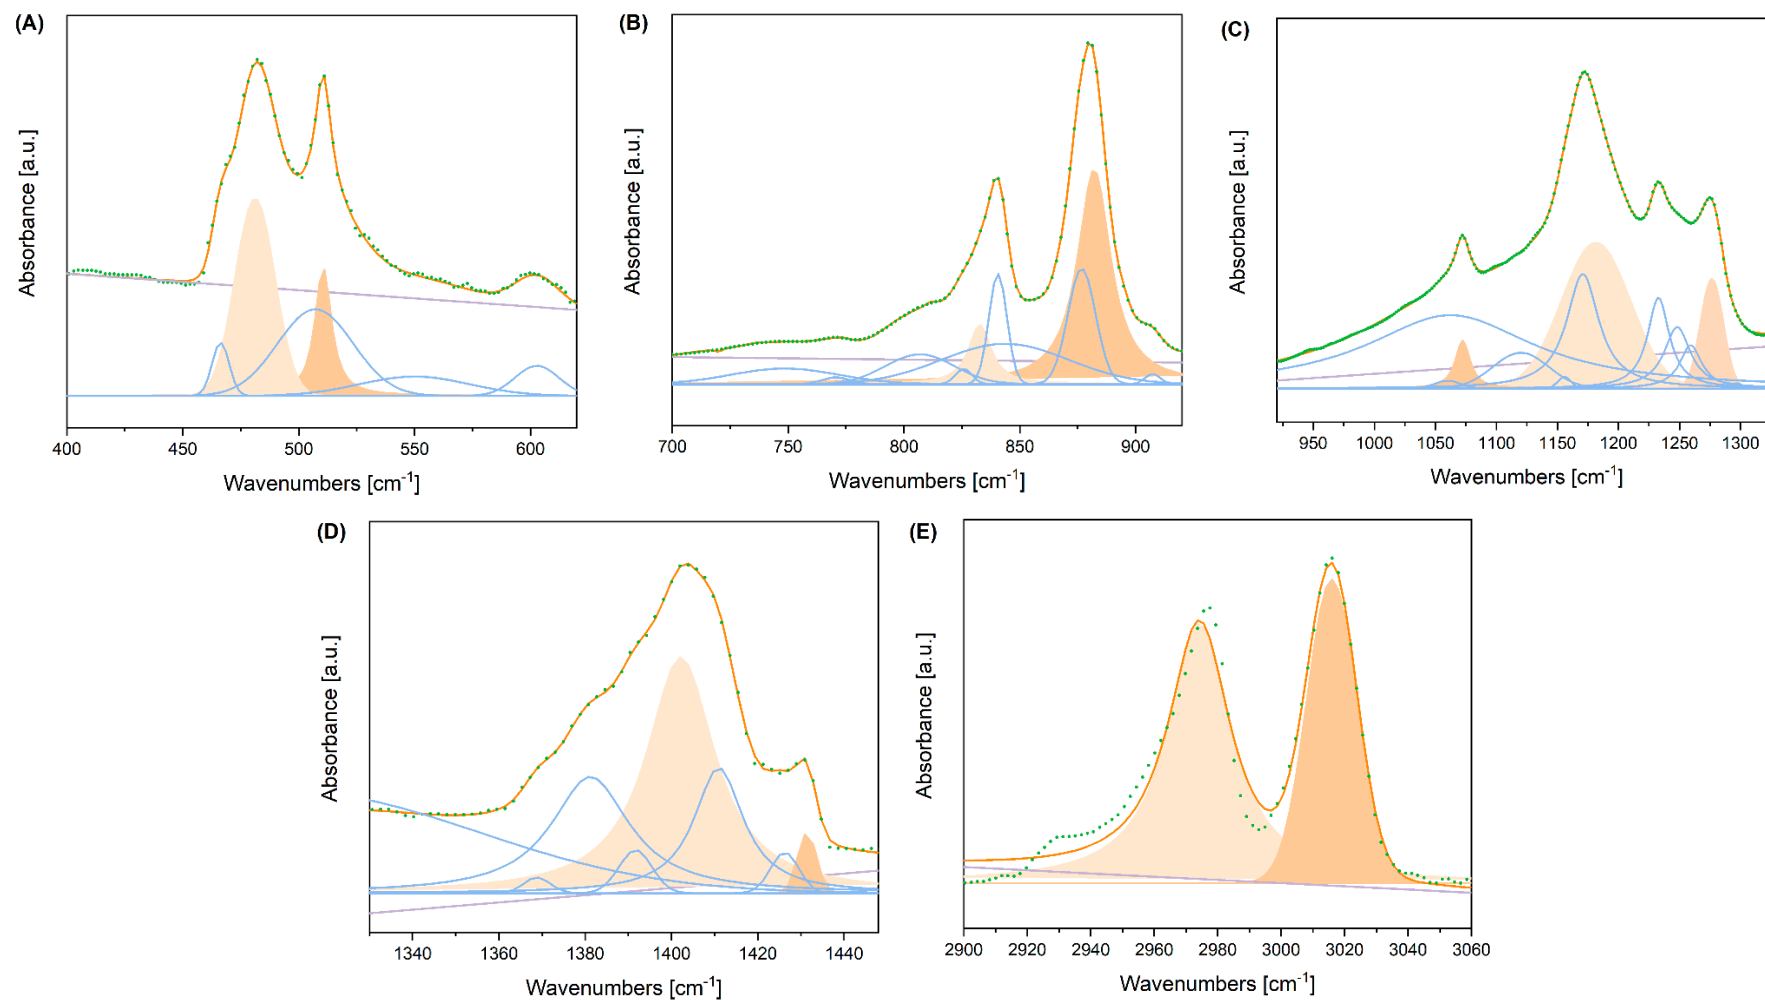

**Figure S2:** Results of the band deconvolution of selected regions of the Infrared spectrum of a PVDF film. The deconvolution was performed by the Fityk software (M. Wojdyr, *J. Appl. Cryst.* 43, 1126-1128 (2010)). In each panel: green dots are the experimental spectra, the orange line is the reconstructed spectrum, the violet line is the linear baseline, the orange-filled curves are the single components related to the  $\beta$ -phase of PVDF (see main text), and the light blue curves are the other single components.

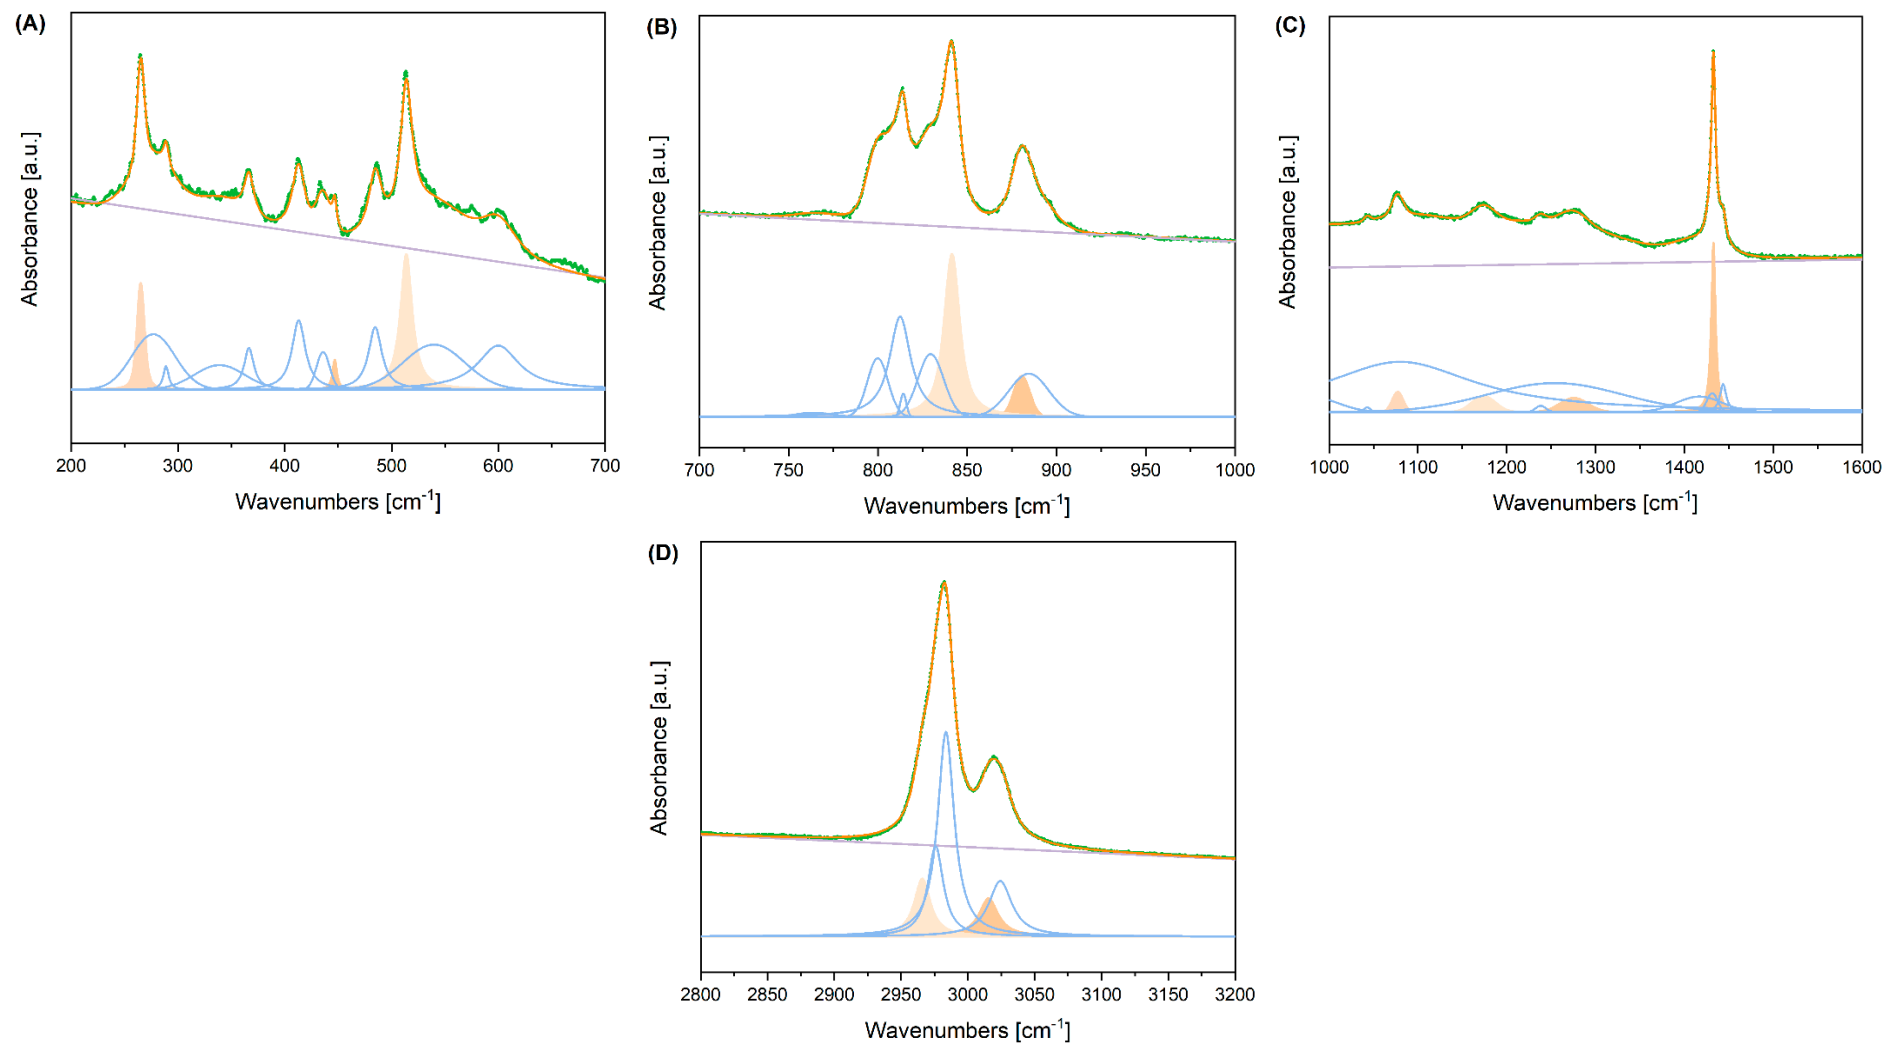

**Figure S3:** Results of the band deconvolution of selected regions of the Raman spectrum of a PVDF film. The deconvolution was performed by the Fityk software (M. Wojdyr, *J. Appl. Cryst.* 43, 1126-1128 (2010)). In each panel: green dots are the experimental spectra, the orange line is the reconstructed spectrum, the violet line is the linear baseline, the orange-filled curves are the single components related to the  $\beta$ -phase of PVDF (see main text), and the light blue curves are the additional components.

**Table S1:** Wavenumbers, IR intensity ( $\text{km mol}^{-1}$ ), and Raman activities ( $\text{\AA}^4 \text{mol}^{-1}$ ) of normal modes of PVDF from the DFT computed spectra of the 3D  $\beta$  crystal for increasing values of the expansion factor  $f$ . (A)  $f$  describes the isotropic cell expansion in the ( $\mathbf{a}$ ,  $\mathbf{b}$ ) plane, (B)  $f$  describes the cell expansion along the  $\mathbf{a}$  axis. The color of the cell background identifies the symmetry species of each mode.  $A_1$ : white,  $A_2$ : yellow,  $B_1$ : blue,  $B_2$ : green. Gray cells correspond to translations.

(A) ISOTROPIC CELL EXPANSION IN THE ( $\mathbf{a}$ , $\mathbf{b}$ ) PLANE  $\rightarrow$  ISOLATED CHAIN = 1D CRYSTAL,  $f$  from 1 to 1.3

| 3D crystal, $f=1$ |              |                | 1.02        |              |                | 1.06        |              |                | 1.1         |              |                | 1.2         |              |                | 1.3         |              |                |
|-------------------|--------------|----------------|-------------|--------------|----------------|-------------|--------------|----------------|-------------|--------------|----------------|-------------|--------------|----------------|-------------|--------------|----------------|
| Wave number       | IR Intensity | Raman Activity | Wave number | IR Intensity | Raman Activity | Wave number | IR Intensity | Raman Activity | Wave number | IR Intensity | Raman Activity | Wave number | IR Intensity | Raman Activity | Wave number | IR Intensity | Raman Activity |
| -0.06             | 0.00         | 0.00           | -0.08       | 0.00         | 0.00           | -0.13       | 0.00         | 0.00           | -0.32       | 0.00         | 0.00           | -2.03       | 0.43         | 0.00           | -13.07      | 4.19         | 0.00           |
| -0.05             | 0.00         | 0.00           | -0.05       | 0.00         | 0.00           | -0.08       | 0.00         | 0.00           | -0.09       | 0.00         | 0.00           | -0.21       | 0.00         | 0.00           | -0.07       | 0.00         | 0.00           |
| -0.04             | 0.00         | 0.00           | -0.04       | 0.00         | 0.00           | -0.04       | 0.00         | 0.00           | -0.03       | 0.00         | 0.00           | -0.07       | 0.00         | 0.00           | -0.05       | 0.00         | 0.00           |
| 74.59             | 9.79         | 0.01           | 53.05       | 9.17         | 0.02           | 29.21       | 7.84         | 0.02           | 19.99       | 6.65         | 0.02           | 6.64        | 4.58         | 0.01           | 0.69        | 0.01         | 0.00           |
| 260.96            | 0.00         | 0.70           | 260.58      | 0.00         | 0.67           | 259.82      | 0.00         | 0.62           | 259.03      | 0.00         | 0.58           | 258.79      | 0.00         | 0.50           | 258.75      | 0.00         | 0.45           |
| 444.03            | 9.73         | 0.80           | 432.32      | 8.21         | 0.81           | 426.77      | 5.91         | 0.79           | 428.30      | 4.26         | 0.68           | 429.69      | 2.32         | 0.41           | 429.93      | 1.54         | 0.23           |
| 452.18            | 35.11        | 1.63           | 451.40      | 34.26        | 1.58           | 450.52      | 32.95        | 1.50           | 450.28      | 32.03        | 1.42           | 450.73      | 30.76        | 1.24           | 451.02      | 30.12        | 1.12           |
| 513.38            | 14.72        | 3.41           | 512.09      | 13.92        | 3.34           | 511.63      | 12.54        | 3.19           | 511.66      | 11.42        | 3.00           | 512.82      | 9.50         | 2.55           | 512.78      | 8.26         | 2.08           |
| 861.76            | 58.06        | 17.59          | 862.81      | 54.72        | 17.01          | 864.23      | 48.63        | 15.65          | 866.09      | 43.64        | 14.69          | 870.97      | 35.44        | 12.39          | 873.74      | 30.02        | 10.68          |
| 903.88            | 72.64        | 4.16           | 904.80      | 68.50        | 4.07           | 904.87      | 62.62        | 3.76           | 905.54      | 57.63        | 3.74           | 909.05      | 48.41        | 3.45           | 912.14      | 42.26        | 3.22           |
| 1081.11           | 32.67        | 4.45           | 1079.69     | 33.80        | 4.44           | 1077.15     | 35.41        | 4.42           | 1075.24     | 36.54        | 4.37           | 1072.59     | 38.54        | 4.18           | 1070.79     | 39.82        | 3.91           |
| 1172.95           | 303.43       | 4.86           | 1177.65     | 295.06       | 5.01           | 1187.49     | 277.84       | 5.15           | 1197.16     | 261.86       | 4.98           | 1195.91     | 0.00         | 10.97          | 1193.94     | 0.00         | 10.24          |
| 1203.67           | 0.00         | 13.28          | 1202.23     | 0.00         | 12.89          | 1200.23     | 0.00         | 12.29          | 1198.41     | 0.00         | 11.85          | 1215.32     | 230.69       | 4.07           | 1227.77     | 209.78       | 3.14           |
| 1299.09           | 218.60       | 10.75          | 1301.15     | 212.79       | 10.83          | 1305.18     | 201.59       | 10.92          | 1309.24     | 191.11       | 10.90          | 1317.46     | 169.41       | 10.85          | 1323.42     | 153.73       | 10.83          |
| 1414.84           | 133.91       | 0.21           | 1412.95     | 132.87       | 0.25           | 1409.68     | 131.58       | 0.29           | 1407.51     | 130.82       | 0.30           | 1404.46     | 129.63       | 0.24           | 1402.45     | 129.81       | 0.21           |
| 1448.25           | 6.40         | 20.09          | 1444.40     | 5.90         | 19.24          | 1444.85     | 5.62         | 17.95          | 1447.27     | 5.36         | 17.05          | 1451.92     | 4.84         | 15.57          | 1454.69     | 4.21         | 13.16          |
| 3108.41           | 6.71         | 222.01         | 3104.58     | 4.64         | 213.90         | 3095.20     | 2.43         | 191.76         | 3091.00     | 1.28         | 176.34         | 3090.51     | 0.25         | 138.27         | 3092.39     | 0.03         | 111.36         |
| 3166.68           | 8.04         | 85.53          | 3162.51     | 5.28         | 85.59          | 3151.99     | 2.49         | 82.08          | 3147.65     | 1.05         | 80.53          | 3146.43     | 0.03         | 69.89          | 3148.02     | 0.05         | 58.80          |

(A) ISOTROPIC CELL EXPANSION IN THE (a,b) PLANE → ISOLATED CHAIN = 1D CRYSTAL, f from 1.4 to 2

| 1.4         |              |                | 1.5         |              |                | 1.6         |              |                | 1.8         |              |                | 2           |              |                | single chain (1D crystal) |              |                |
|-------------|--------------|----------------|-------------|--------------|----------------|-------------|--------------|----------------|-------------|--------------|----------------|-------------|--------------|----------------|---------------------------|--------------|----------------|
| Wave number | IR intensity | Raman Activity | Wave number | IR intensity | Raman Activity | Wave number | IR intensity | Raman Activity | Wave number | IR intensity | Raman Activity | Wave number | IR intensity | Raman Activity | Wave number               | IR intensity | Raman Activity |
| -20.92      | 3.69         | 0.00           | -21.28      | 3.34         | 0.00           | -49.22      | 3.04         | 0.00           | -10.08      | 2.65         | 0.00           | -2.05       | 0.80         | 0.00           | -8.53                     | 2.02         | 0.00           |
| -0.11       | 0.00         | 0.00           | -0.23       | 0.00         | 0.00           | -5.82       | 0.00         | 0.00           | -0.29       | 0.00         | 0.00           | -0.06       | 0.00         | 0.00           | -0.06                     | 0.00         | 0.00           |
| -0.03       | 0.00         | 0.00           | -0.03       | 0.00         | 0.00           | -0.04       | 0.00         | 0.00           | -0.05       | 0.00         | 0.00           | -0.05       | 0.00         | 0.00           | -0.05                     | 0.00         | 0.00           |
| 0.80        | 0.01         | 0.00           | 0.89        | 0.01         | 0.00           | 8.16        | 0.10         | 0.00           | 2.39        | 0.15         | 0.00           | 3.09        | 1.83         | 0.00           | 1.99                      | 0.11         | 0.00           |
| 258.84      | 0.00         | 0.42           | 259.22      | 0.00         | 0.40           | 259.64      | 0.00         | 0.38           | 259.76      | 0.00         | 0.35           | 259.89      | 0.00         | 0.34           | 260.33                    | 0.00         | 0.28           |
| 430.25      | 1.08         | 0.15           | 430.93      | 0.81         | 0.10           | 424.25      | 0.56         | 0.07           | 430.37      | 0.51         | 0.05           | 430.96      | 0.44         | 0.04           | 428.68                    | 0.29         | 0.02           |
| 451.22      | 29.71        | 1.04           | 451.79      | 29.32        | 0.98           | 452.29      | 28.99        | 0.94           | 452.37      | 28.49        | 0.88           | 452.77      | 28.20        | 0.84           | 453.45                    | 26.89        | 0.71           |
| 512.73      | 7.40         | 1.76           | 513.34      | 6.77         | 1.55           | 513.81      | 6.27         | 1.40           | 513.57      | 5.66         | 1.25           | 513.59      | 5.25         | 1.14           | 513.52                    | 3.92         | 0.82           |
| 876.09      | 26.21        | 9.65           | 878.30      | 23.72        | 8.91           | 883.19      | 22.07        | 8.31           | 882.12      | 19.93        | 7.92           | 881.81      | 18.03        | 7.61           | 884.09                    | 12.83        | 6.49           |
| 914.68      | 37.77        | 3.03           | 916.93      | 34.63        | 2.80           | 924.03      | 34.40        | 2.69           | 920.34      | 29.27        | 2.38           | 921.86      | 27.29        | 2.22           | 926.83                    | 20.08        | 1.63           |
| 1069.50     | 40.74        | 3.72           | 1068.53     | 41.30        | 3.61           | 1067.62     | 41.63        | 3.52           | 1066.18     | 42.41        | 3.41           | 1065.20     | 42.84        | 3.33           | 1058.09                   | 47.33        | 3.08           |
| 1192.93     | 0.00         | 9.69           | 1191.87     | 0.00         | 9.29           | 1191.21     | 0.00         | 9.00           | 1190.00     | 0.00         | 8.60           | 1189.09     | 0.00         | 8.32           | 1185.42                   | 0.00         | 7.27           |
| 1237.01     | 195.74       | 2.58           | 1243.94     | 185.81       | 2.30           | 1250.77     | 176.32       | 2.09           | 1254.76     | 167.73       | 1.95           | 1258.56     | 160.62       | 1.83           | 1273.40                   | 135.70       | 1.42           |
| 1327.53     | 143.24       | 10.89          | 1331.37     | 135.83       | 10.97          | 1327.76     | 132.88       | 12.47          | 1339.17     | 121.52       | 11.04          | 1337.42     | 116.76       | 11.08          | 1341.83                   | 98.17        | 11.42          |
| 1400.83     | 130.45       | 0.21           | 1399.46     | 131.18       | 0.22           | 1397.87     | 131.94       | 0.23           | 1395.94     | 132.56       | 0.23           | 1394.58     | 133.08       | 0.24           | 1384.57                   | 133.54       | 0.24           |
| 1456.17     | 3.66         | 11.38          | 1457.16     | 3.23         | 10.33          | 1445.62     | 0.12         | 8.39           | 1456.71     | 2.98         | 9.19           | 1456.89     | 2.63         | 8.73           | 1456.68                   | 1.82         | 7.49           |
| 3093.76     | 0.00         | 95.84          | 3094.77     | 0.06         | 85.60          | 3119.12     | 0.15         | 79.31          | 3094.08     | 0.37         | 71.08          | 3093.23     | 0.55         | 65.93          | 3090.81                   | 1.45         | 48.30          |
| 3149.51     | 0.20         | 51.45          | 3150.70     | 0.41         | 46.14          | 3149.22     | 0.60         | 42.56          | 3150.90     | 0.97         | 38.04          | 3150.53     | 1.23         | 35.13          | 3148.57                   | 2.38         | 25.19          |

(B) CELL EXPANSION ALONG THE **a** AXIS → VERTICAL SLAB, f from 1 to 1.3

| 3D crystal, f=1 |              |                | 1.02        |              |                | 1.06        |              |                | 1.1         |              |                | 1.2         |              |                | 1.3         |              |                |
|-----------------|--------------|----------------|-------------|--------------|----------------|-------------|--------------|----------------|-------------|--------------|----------------|-------------|--------------|----------------|-------------|--------------|----------------|
| Wave number     | IR intensity | Raman Activity | Wave number | IR intensity | Raman Activity | Wave number | IR intensity | Raman Activity | Wave number | IR intensity | Raman Activity | Wave number | IR intensity | Raman Activity | Wave number | IR intensity | Raman Activity |
| -0.06           | 0.00         | 0.00           | -0.06       | 0.00         | 0.00           | -0.07       | 0.00         | 0.00           | -10.35      | 7.52         | 0.01           | -0.45       | 0.00         | 0.00           | -0.51       | 0.00         | 0.00           |
| -0.05           | 0.00         | 0.00           | -0.06       | 0.00         | 0.00           | -0.04       | 0.00         | 0.00           | -0.10       | 0.00         | 0.00           | -0.09       | 0.00         | 0.00           | -0.11       | 0.00         | 0.00           |
| -0.04           | 0.00         | 0.00           | -0.04       | 0.00         | 0.00           | -0.04       | 0.00         | 0.00           | -0.03       | 0.00         | 0.00           | -0.03       | 0.00         | 0.00           | -0.03       | 0.00         | 0.00           |
| 74.59           | 9.79         | 0.01           | 78.78       | 8.46         | 0.01           | 52.64       | 7.93         | 0.02           | 0.91        | 0.06         | 0.00           | 27.44       | 5.76         | 0.01           | 32.09       | 4.88         | 0.00           |
| 260.96          | 0.00         | 0.70           | 261.03      | 0.00         | 0.67           | 260.90      | 0.00         | 0.63           | 260.13      | 0.00         | 0.58           | 259.83      | 0.00         | 0.50           | 259.70      | 0.00         | 0.44           |
| 444.03          | 9.73         | 0.80           | 452.11      | 34.72        | 1.62           | 442.58      | 6.78         | 0.88           | 430.83      | 5.60         | 0.65           | 436.59      | 3.80         | 0.54           | 436.18      | 2.93         | 0.44           |
| 452.18          | 35.11        | 1.63           | 455.84      | 8.44         | 0.78           | 451.69      | 33.99        | 1.60           | 451.31      | 33.51        | 1.59           | 451.62      | 32.80        | 1.57           | 451.85      | 32.54        | 1.55           |
| 513.38          | 14.72        | 3.41           | 514.02      | 14.47        | 3.34           | 512.82      | 14.47        | 3.29           | 512.16      | 14.85        | 3.34           | 513.32      | 14.89        | 3.17           | 513.71      | 14.93        | 3.03           |
| 861.76          | 58.06        | 17.59          | 863.01      | 57.03        | 17.19          | 864.27      | 55.37        | 16.47          | 863.49      | 54.38        | 15.67          | 866.03      | 51.80        | 14.62          | 866.99      | 50.63        | 13.97          |
| 903.88          | 72.64        | 4.16           | 905.76      | 70.60        | 4.06           | 908.23      | 61.92        | 3.50           | 906.50      | 55.21        | 3.39           | 908.88      | 44.14        | 2.88           | 910.04      | 37.25        | 2.57           |
| 1081.11         | 32.67        | 4.45           | 1080.87     | 33.10        | 4.45           | 1080.04     | 34.35        | 4.58           | 1078.82     | 34.99        | 4.66           | 1077.74     | 35.81        | 4.80           | 1077.10     | 36.28        | 4.86           |
| 1172.95         | 303.43       | 4.86           | 1175.53     | 291.88       | 4.79           | 1178.56     | 277.33       | 4.99           | 1180.81     | 263.63       | 4.72           | 1189.94     | 232.21       | 4.41           | 1196.02     | 208.26       | 3.95           |
| 1203.67         | 0.00         | 13.28          | 1202.95     | 0.00         | 12.67          | 1202.97     | 0.00         | 11.74          | 1201.92     | 0.00         | 10.97          | 1200.74     | 0.00         | 9.51           | 1199.99     | 0.00         | 8.46           |
| 1299.09         | 218.60       | 10.75          | 1299.74     | 216.78       | 10.67          | 1301.49     | 214.88       | 10.72          | 1302.59     | 213.80       | 10.70          | 1305.61     | 211.36       | 10.69          | 1307.35     | 210.20       | 10.73          |
| 1414.84         | 133.91       | 0.21           | 1414.16     | 133.51       | 0.22           | 1413.11     | 131.97       | 0.24           | 1412.02     | 131.19       | 0.25           | 1410.90     | 130.04       | 0.26           | 1410.33     | 129.47       | 0.26           |
| 1448.25         | 6.40         | 20.09          | 1455.09     | 7.04         | 19.71          | 1452.50     | 7.36         | 18.87          | 1448.19     | 7.41         | 18.85          | 1454.55     | 8.31         | 17.58          | 1456.99     | 8.78         | 16.61          |
| 3108.41         | 6.71         | 222.01         | 3109.10     | 5.65         | 214.64         | 3103.39     | 4.09         | 196.64         | 3097.80     | 3.38         | 183.69         | 3099.28     | 2.24         | 156.66         | 3100.87     | 1.81         | 137.93         |
| 3166.68         | 8.04         | 85.53          | 3167.45     | 5.73         | 83.19          | 3160.79     | 2.95         | 77.52          | 3154.78     | 1.84         | 72.40          | 3155.36     | 0.56         | 62.71          | 3156.07     | 0.32         | 54.52          |

(B) CELL EXPANSION ALONG THE a AXIS → VERTICAL SLAB, f from 1.4 to 2

| 1.4         |              |                | 1.5         |              |                | 1.6         |              |                | 1.8         |              |                | 2           |              |                | single chain (1D crystal) |              |                |
|-------------|--------------|----------------|-------------|--------------|----------------|-------------|--------------|----------------|-------------|--------------|----------------|-------------|--------------|----------------|---------------------------|--------------|----------------|
| Wave number | IR intensity | Raman Activity | Wave number | IR intensity | Raman Activity | Wave number | IR intensity | Raman Activity | Wave number | IR intensity | Raman Activity | Wave number | IR intensity | Raman Activity | Wave number               | IR intensity | Raman Activity |
| -0.85       | 0.00         | 0.00           | -7.41       | 0.07         | 0.00           | -2.69       | 0.00         | 0.00           | -0.63       | 0.00         | 0.00           | -0.61       | 0.00         | 0.00           | -8.53                     | 2.02         | 0.00           |
| -0.08       | 0.00         | 0.00           | -1.51       | 0.00         | 0.00           | -0.78       | 0.00         | 0.00           | -0.12       | 0.00         | 0.00           | -0.10       | 0.00         | 0.00           | -0.06                     | 0.00         | 0.00           |
| -0.04       | 0.00         | 0.00           | -0.09       | 0.00         | 0.00           | -0.04       | 0.00         | 0.00           | -0.12       | 0.00         | 0.00           | -0.03       | 0.00         | 0.00           | -0.05                     | 0.00         | 0.00           |
| 27.58       | 4.36         | 0.00           | 53.91       | 3.86         | 0.00           | 34.26       | 3.56         | 0.00           | 36.86       | 3.12         | 0.00           | 39.06       | 2.84         | 0.00           | 1.99                      | 0.11         | 0.00           |
| 259.56      | 0.00         | 0.41           | 259.69      | 0.00         | 0.38           | 259.84      | 0.00         | 0.35           | 259.87      | 0.00         | 0.32           | 259.92      | 0.00         | 0.30           | 260.33                    | 0.00         | 0.28           |
| 435.02      | 2.47         | 0.39           | 436.11      | 2.19         | 0.29           | 436.61      | 1.93         | 0.28           | 437.25      | 1.67         | 0.24           | 437.36      | 1.51         | 0.22           | 428.68                    | 0.29         | 0.02           |
| 451.87      | 32.44        | 1.55           | 452.07      | 32.38        | 1.54           | 446.51      | 31.39        | 1.57           | 452.16      | 32.25        | 1.53           | 452.27      | 32.25        | 1.53           | 453.45                    | 26.89        | 0.71           |
| 513.44      | 14.88        | 2.87           | 512.94      | 14.88        | 2.74           | 513.83      | 14.88        | 2.63           | 513.94      | 14.87        | 2.51           | 514.07      | 14.86        | 2.43           | 513.52                    | 3.92         | 0.82           |
| 867.25      | 50.23        | 13.52          | 866.24      | 49.30        | 13.19          | 867.53      | 49.77        | 12.96          | 867.92      | 49.84        | 12.69          | 867.71      | 49.53        | 12.53          | 884.09                    | 12.83        | 6.49           |
| 910.52      | 32.54        | 2.34           | 908.78      | 28.29        | 2.15           | 911.57      | 26.88        | 2.04           | 912.62      | 23.59        | 1.84           | 913.19      | 21.30        | 1.70           | 926.83                    | 20.08        | 1.63           |
| 1076.78     | 36.44        | 4.88           | 1076.67     | 36.60        | 4.89           | 1076.18     | 37.46        | 4.87           | 1076.56     | 36.80        | 4.90           | 1076.49     | 36.80        | 4.90           | 1058.09                   | 47.33        | 3.08           |
| 1198.84     | 0.00         | 7.68           | 1198.73     | 0.00         | 7.09           | 1198.57     | 0.00         | 6.66           | 1198.35     | 0.00         | 6.03           | 1198.38     | 0.00         | 5.59           | 1185.42                   | 0.00         | 7.27           |
| 513.44      | 14.88        | 2.87           | 512.94      | 14.88        | 2.74           | 513.83      | 14.88        | 2.63           | 513.94      | 14.87        | 2.51           | 514.07      | 14.86        | 2.43           | 513.52                    | 3.92         | 0.82           |
| 1200.25     | 190.92       | 3.61           | 1203.48     | 178.78       | 3.37           | 1206.56     | 167.83       | 3.21           | 1211.05     | 152.99       | 3.02           | 1214.35     | 142.54       | 2.89           | 1273.40                   | 135.70       | 1.42           |
| 1307.99     | 209.38       | 10.74          | 1309.09     | 207.79       | 10.53          | 1308.38     | 208.88       | 10.76          | 1309.75     | 208.50       | 10.78          | 1308.56     | 208.64       | 10.78          | 1341.83                   | 98.17        | 11.42          |
| 1410.34     | 129.40       | 0.26           | 1410.20     | 129.35       | 0.26           | 1408.10     | 129.44       | 0.25           | 1410.00     | 129.20       | 0.26           | 1410.28     | 129.20       | 0.26           | 1384.57                   | 133.54       | 0.24           |
| 1458.33     | 8.98         | 15.86          | 1462.64     | 10.98        | 15.36          | 1460.03     | 9.28         | 14.89          | 1460.68     | 9.32         | 14.51          | 1460.51     | 9.38         | 14.27          | 1456.68                   | 1.82         | 7.49           |
| 3103.18     | 1.67         | 126.67         | 3104.85     | 1.59         | 118.72         | 3105.44     | 1.52         | 114.27         | 3105.54     | 1.46         | 108.53         | 3105.32     | 1.45         | 104.92         | 3090.81                   | 1.45         | 48.30          |
